# Supplementary material
Source: MDPI journal article supplement (https://www.mdpi.com/2072-4292/15/2/426)
Supplement: s1 [file s1]

**Supplementary Information for:**

**Change of human footprint in China and its implications for**

**CO<sub>2</sub> emissions**

### ***Supplementary Notes***

The basic of the seven major physical geographical divisions in China is determined on the basis of science, integrating multiple dimensions such as history and nationality, and following relevant division principles.

**Northeast** provinces: Heilongjiang, Jilin, Liaoning

**North** provinces: Beijing, Tianjin, Hebei, Shanxi, Inner Mongolia

**Northwest** provinces: Gansu, Ningxia, Shan'xi, Qinghai, Xinjiang

**East** provinces: Shanghai, Jiangsu, Zhejiang, Anhui, Shandong

**Central** provinces: Hunan, Hubei, Henan, Jiangxi

**Southwest** provinces: Sichuan, Chongqing, Tibet, Yunnan, Guizhou

**South** provinces: Guangdong, Guangxi, Fujian, Hainan

***Supplementary Table Captions***

**Table S1.** Spatio-temporal characteristics of the human footprints in China.

**Table S2.** Spatio-temporal characteristics of CO<sub>2</sub> emissions.

**Table S1.** Spatio-temporal characteristics of the human footprints in China.

| Region    | Human footprint area ( $\times 10^4$ km <sup>2</sup> ) | 2000   | 2005   | 2010   | 2015   | 2017   | Chang rate (%) | 2000–2017 |
|-----------|--------------------------------------------------------|--------|--------|--------|--------|--------|----------------|-----------|
| Central   | Low (0–20)                                             | 48.77  | 47.97  | 47.93  | 43.29  | 39.72  | -18.56         | 46.78     |
|           | Moderate (20–30)                                       | 17.64  | 18.19  | 17.91  | 22.02  | 25.39  | 43.93          | 19.18     |
|           | High (30–60)                                           | 0.67   | 0.92   | 1.24   | 1.77   | 1.97   | 194.03         | 1.12      |
| East      | Low (0–20)                                             | 18.86  | 17.85  | 18.57  | 16.11  | 14.81  | -21.47         | 16.36     |
|           | Moderate (20–30)                                       | 29.27  | 29.71  | 28.28  | 29.46  | 30.09  | 2.80           | 30.8      |
|           | High (30–60)                                           | 0.6    | 1.17   | 1.88   | 3.16   | 3.83   | 538.33         | 1.57      |
| North     | Low (0–20)                                             | 144.45 | 142.52 | 143.69 | 141.19 | 138.18 | -4.34          | 142.29    |
|           | Moderate (20–30)                                       | 16.19  | 17.71  | 16.3   | 18.35  | 20.13  | 24.34          | 17.83     |
|           | High (30–60)                                           | 0.73   | 1.12   | 1.38   | 1.82   | 3.06   | 319.18         | 1.24      |
| Northeast | Low (0–20)                                             | 79.54  | 76.86  | 75.08  | 73.36  | 73.07  | -8.13          | 75.67     |
|           | Moderate (20–30)                                       | 10.97  | 13.61  | 15.09  | 16.33  | 16.55  | 50.87          | 14.68     |
|           | High (30–60)                                           | 0.36   | 0.4    | 0.7    | 1.18   | 1.25   | 247.22         | 0.51      |
| Northwest | Low (0–20)                                             | 276.12 | 275.06 | 275.16 | 269.27 | 266.81 | -3.37          | 275.11    |
|           | Moderate (20–30)                                       | 2.51   | 3.53   | 3.37   | 9      | 11.46  | 356.57         | 3.43      |
|           | High (30–60)                                           | 0.11   | 0.15   | 0.21   | 0.47   | 0.47   | 327.27         | 0.22      |
| South     | Low (0–20)                                             | 46.18  | 45.38  | 44.8   | 41.87  | 40.77  | -11.72         | 44.7      |
|           | Moderate (20–30)                                       | 3.25   | 3.99   | 4.23   | 6.71   | 7.51   | 131.08         | 4.24      |
|           | High (30–60)                                           | 0.13   | 0.19   | 0.53   | 0.98   | 1.28   | 884.62         | 0.62      |
| Southwest | Low (0–20)                                             | 85.59  | 83.58  | 83.58  | 77.01  | 71.69  | -16.24         | 83.2      |
|           | Moderate (20–30)                                       | 7.73   | 9.7    | 9.59   | 15.49  | 20.71  | 167.92         | 9.95      |
|           | High (30–60)                                           | 0.07   | 0.11   | 0.22   | 0.89   | 0.99   | 1314.29        | 0.24      |
| China     | Low (0–20)                                             | 699.5  | 689.21 | 688.82 | 662.09 | 645.05 | -7.78          | 684.09    |
|           | Moderate (20–30)                                       | 87.57  | 96.44  | 94.75  | 117.37 | 131.84 | 50.55          | 100.11    |
|           | High (30–60)                                           | 2.66   | 4.07   | 6.16   | 10.27  | 12.84  | 382.71         | 5.53      |

**Table S2.** Spatio-temporal characteristics of CO<sub>2</sub> emissions.

| Region    | CO2 (Mt)         | 2000    | 2005    | 2010    | 2015    | 2017    | 2000–2017 |
|-----------|------------------|---------|---------|---------|---------|---------|-----------|
| Central   | Low (0–20)       | 476.33  | 755.62  | 1106.13 | 1249.49 | 1288.36 | 812.03    |
|           | Moderate (20–30) | 0       | 0       | 47.84   | 66.54   | 107.45  | 107.45    |
|           | High (30–60)     | 0       | 0       | 0       | 0       | 0       | 0         |
| East      | Low (0–20)       | 682.95  | 1288.54 | 1664.74 | 1704.06 | 1749.03 | 1066.08   |
|           | Moderate (20–30) | 51.11   | 142.29  | 462.91  | 485.62  | 507.61  | 456.50    |
|           | High (30–60)     | 0       | 41.31   | 56.43   | 44.54   | 43.77   | 43.77     |
| North     | Low (0–20)       | 654.95  | 1086.86 | 1414.58 | 1452.49 | 1451.92 | 796.97    |
|           | Moderate (20–30) | 12.26   | 59.6    | 382.62  | 473.08  | 512.18  | 499.92    |
|           | High (30–60)     | 0       | 0       | 0       | 30.08   | 34.26   | 34.26     |
| Northeast | Low (0–20)       | 400.53  | 588.89  | 792.98  | 800.13  | 795.49  | 394.96    |
|           | Moderate (20–30) | 0       | 10.52   | 64.29   | 103     | 109.32  | 109.32    |
|           | High (30–60)     | 0       | 0       | 0       | 0       | 0       | 0         |
| Northwest | Low (0–20)       | 229.78  | 376.44  | 588.98  | 764.02  | 789     | 559.22    |
|           | Moderate (20–30) | 0       | 0       | 56.68   | 120.72  | 210.15  | 210.15    |
|           | High (30–60)     | 0       | 0       | 0       | 0       | 0       | 0         |
| South     | Low (0–20)       | 323.29  | 479.46  | 664.21  | 764.28  | 783.81  | 460.52    |
|           | Moderate (20–30) | 33.56   | 52.91   | 131.47  | 153.61  | 194.93  | 161.37    |
|           | High (30–60)     | 0       | 34.33   | 46.56   | 45.05   | 44.03   | 44.03     |
| Southwest | Low (0–20)       | 330.06  | 506.79  | 720.48  | 761.77  | 828.98  | 498.92    |
|           | Moderate (20–30) | 0       | 13.14   | 54.52   | 76.08   | 80.82   | 80.82     |
|           | High (30–60)     | 0       | 0       | 0       | 0       | 0       | 0         |
| China     | Low (0–20)       | 3097.89 | 5082.6  | 6952.1  | 7496.24 | 7686.59 | 4588.70   |
|           | Moderate (20–30) | 96.92   | 278.46  | 1200.33 | 1478.64 | 1722.45 | 1625.53   |
|           | High (30–60)     | 0       | 75.64   | 102.99  | 119.67  | 122.06  | 122.06    |

### ***Supplementary Figure Captions***

**Figure S1.** Analytical scope of CO<sub>2</sub> emissions including (a) spatial distribution diagram of the monitoring area at the county level and (b) spatial distribution of regions in China used for estimating CO<sub>2</sub> emissions.

**Figure S2.** Annual CO<sub>2</sub> emissions by seven regions in China.

**Figure S3.** Annual CO<sub>2</sub> emissions (g) per USD in China during 2000–2017. The national average is 1.45 g CO<sub>2</sub> per USD based on the 18-year period.

**Figure S4.** Average CO<sub>2</sub> emissions in China in each provincial administrative unit.

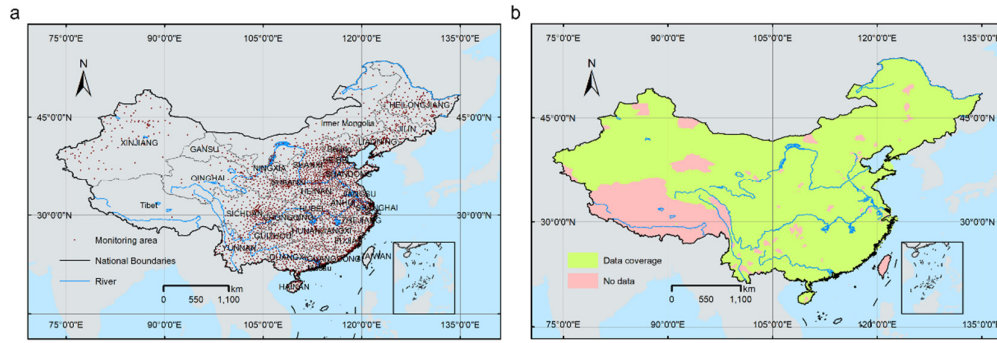

**Figure S1.** Analytical scope of CO<sub>2</sub> emissions including (a) spatial distribution diagram of the monitoring area at the county level and (b) spatial distribution of regions in China used for estimating CO<sub>2</sub> emissions.

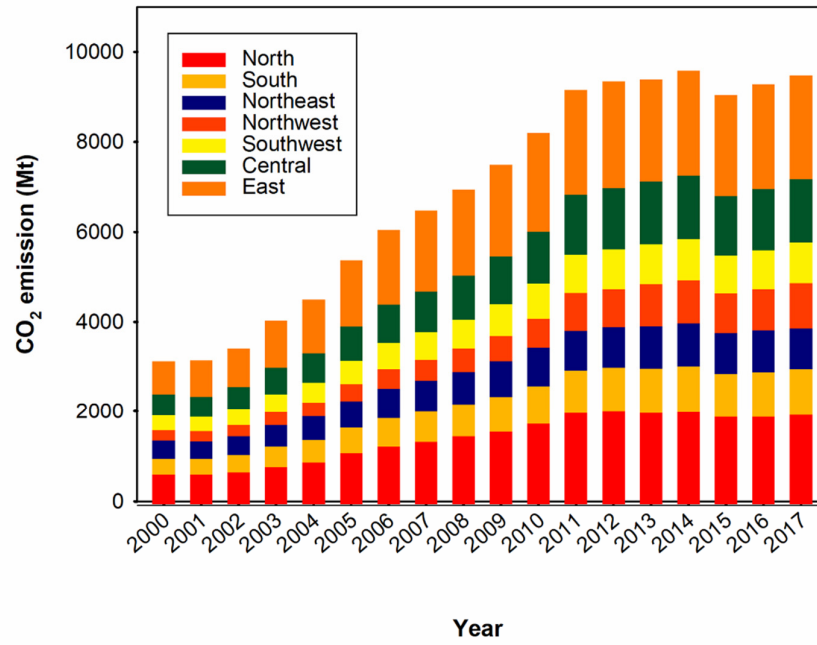

**Figure S2.** Annual CO<sub>2</sub> emissions by seven regions in China.



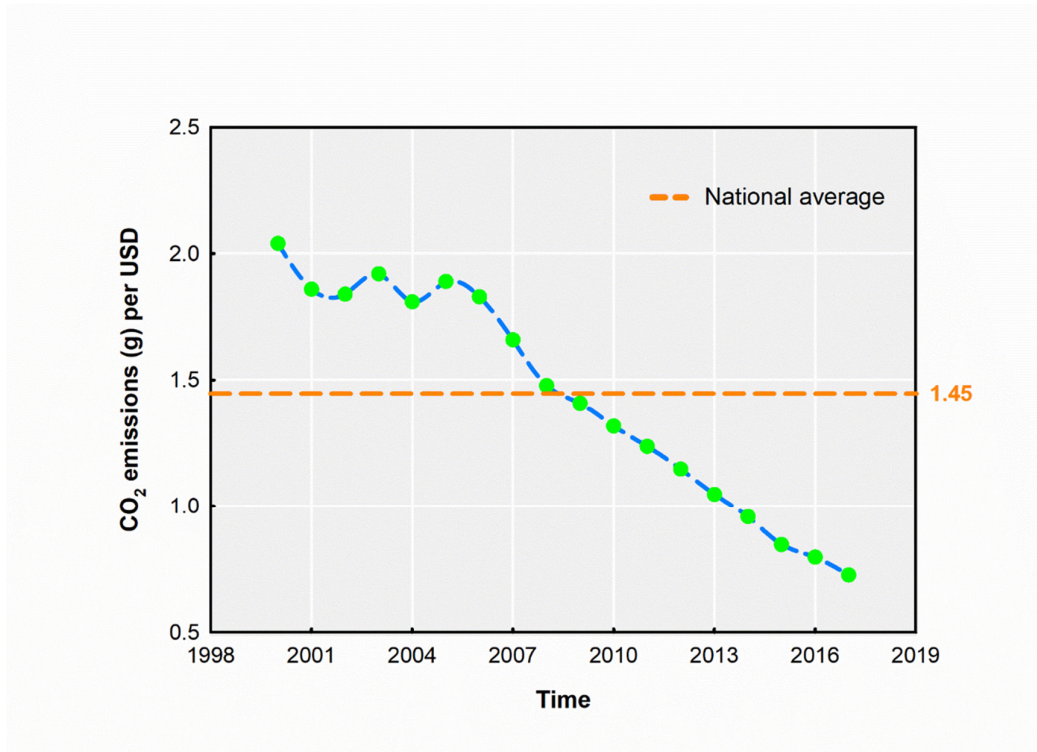

**Figure S3.** Annual CO<sub>2</sub> emissions (g) per USD in China during 2000–2017. National average is 1.45 g CO<sub>2</sub> per USD based the 18-year period.
